# Supplementary material for: Assessing the performance of Moghani crossbred lambs derived from different mating systems with Texel and Booroola sheep
Source: PubMed Central journal article supplement (PMC10994311; doi:10.1371/journal.pone.0301629), 2024-04-04
Supplement: pone.0301629.s001.pdf [file pone.0301629.s001.pdf]

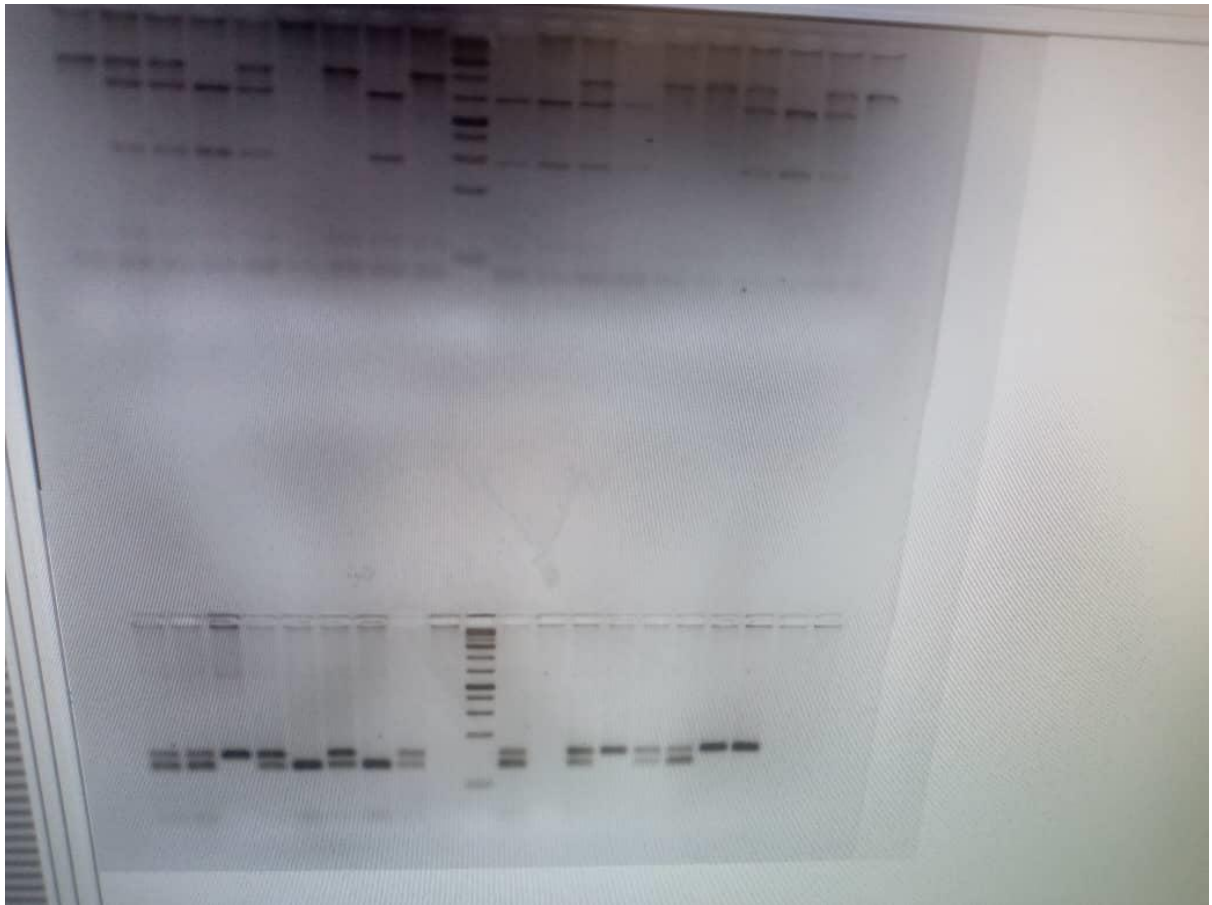

**S1 Fig. Original image depicting PCR-RFLP band patterns migrated on a 3.5% agarose gel through electrophoresis.**
